# Supplementary material for: Airway wall thickness and airflow limitations in asthma assessed in quantitative computed tomography
Source: PubMed Central journal article supplement — Ther Adv Respir Dis. 2020 Jan 22;14:1753466619898598. doi: 10.1177/1753466619898598 (PMC6977202; doi:10.1177/1753466619898598), 2020-01-22
Supplement: Reviewer_1_v.2.pdf [file Reviewer_1_v.2.pdf]

Reviewer 1 v.2

Comments to the Author

I had the privilege of reviewing the manuscript titled "Airway wall thickness and airflow limitations in asthma assessed in quantitative computed tomography" R1, by Mateusz Patyk and colleagues. I have minor comments.

Minor

1) Change obturation to the more universally accepted term "obstruction"

2) I recommend changing this sentence "Computed tomography in the management of asthma for a long time was considered an unnecessary method, providing no additional information. " to : In severe asthma, particularly in uncontrolled disease not responding to therapy or in those patients with atypical presentations, computed tomography has been utilized to rule out asthma mimicking diagnosis. Beyond obtaining an accurate diagnosis, the utility of CT in severe asthma is limited. Chung KF, Wenzel SE, Brozek JL, Bush A, Castro M, Sterk PJ, Adcock IM, Bateman ED, Bel EH, Bleeker ER, Boulet LP, Brightling C, Chanaz P, Dahlen SE, Djukanovic R, Frey U, Gaga M, Gibson P, Hamid Q, Jajour NN, Mauad T, Sorkness RL, Teague WG. International ERS/ATS guidelines on definition, evaluation and treatment of severe asthma. Eur Respir J. 2014 Feb;43(2):343-73.

3) Add (COPD) after chronic obstructive pulmonary disease.

4) add "may" after "Modern imaging techniques"

5) change "Quantitative computed tomography" to QTC

6) please make sure all the term computed tomography is changed to QTC throughout the manuscript.
