# Supplementary material for: Airway wall thickness and airflow limitations in asthma assessed in quantitative computed tomography
Source: PubMed Central journal article supplement — Ther Adv Respir Dis. 2020 Jan 22;14:1753466619898598. doi: 10.1177/1753466619898598 (PMC6977202; doi:10.1177/1753466619898598), 2020-01-22
Supplement: Reviewer_2_v.1.pdf [file Reviewer_2_v.1.pdf]

Reviewer 2 v.1

Comments to the Author

the idea and the way it was crafted into this draft are very good but there are a lot of unnecessary data included in this analysis

please argue why you chose FEF75 and FEF50 as lung function parameters and why you compared it with all ranges of bronchi sizes

please discuss why you did not choose PEF

p values in tables 3,4 are for means or for medians?

fig 6 does not represent a correlation (overall or individually) please correct

please discuss why your findings are important for clinical practice
