# Supplementary material for: Airway wall thickness and airflow limitations in asthma assessed in quantitative computed tomography
Source: PubMed Central journal article supplement — Ther Adv Respir Dis. 2020 Jan 22;14:1753466619898598. doi: 10.1177/1753466619898598 (PMC6977202; doi:10.1177/1753466619898598), 2020-01-22
Supplement: Reviewer_2_v.2.pdf [file Reviewer_2_v.2.pdf]

Reviewer 2 v.2

Comments to the Author

the authors are kindly requested to change in tables' titles means with medians where the content is not harmonised with the title
